# Supplementary material for: Evaluation of acute and sub-chronic toxicity of bitter melon seed extract in Wistar rats
Source: PubMed Central journal article supplement — Toxicol Rep. 2022 Apr 29;9:1024–34. doi: 10.1016/j.toxrep.2022.04.024 (PMC9742884; doi:10.1016/j.toxrep.2022.04.024), 2022-04-29
Supplement: mmc1.pdf [file mmc1.pdf]

## **Supporting information**

### **Evaluation of acute and sub-chronic toxicity of bitter melon seed extract in Wistar rats**

Wan-Yu Chung<sup>1</sup>, Sudhakar Jadhav<sup>2</sup>, Pang-Kuei Hsu<sup>1</sup>, Chen-Meng Kuan<sup>1\*</sup>

<sup>1</sup> Greenyn Biotechnology Co., Ltd., Taichung City, 42881, Taiwan

<sup>2</sup> Jai Research Foundation, Valvada, Gujarat 396105, India

\*Corresponding author: [mengkuan@greenyn.com.tw](mailto:mengkuan@greenyn.com.tw)

Table 1. Pathological examination in male rats.

| Groups                                      |                          | 0 mg/kg | 250 mg/kg | 500 mg/kg | 1000 mg/kg |
|---------------------------------------------|--------------------------|---------|-----------|-----------|------------|
| <b>Organs &amp; Lesions</b>                 | <b>Number of animals</b> | 10      | 10        | 10        | 10         |
| <b>Gross findings</b>                       |                          |         |           |           |            |
| <b>External examination</b>                 |                          |         |           |           |            |
| No abnormality detected                     |                          | 10      | 10        | 10        | 10         |
| <b>Internal examination</b>                 |                          |         |           |           |            |
| No abnormality detected                     |                          | 10      | 10        | 10        | 10         |
| <b>Microscopic examination</b>              |                          |         |           |           |            |
| <b>Kidneys</b>                              |                          |         |           |           |            |
| Basophilic tubules, cortex                  |                          | 1       | X         | X         | 0          |
| Dilation, pelvis                            |                          | 2       | X         | X         | 0          |
| <b>Heart</b>                                |                          |         |           |           |            |
| Infiltrate, inflammatory cells, myocardium  |                          | 0       | X         | X         | 1          |
| <b>Pituitary</b>                            |                          |         |           |           |            |
| Cyst, pars distalis                         |                          | 1       | X         | X         | 1          |
| <b>Prostate</b>                             |                          |         |           |           |            |
| Infiltrate, mononuclear cells, interstitial |                          | 2       | X         | X         | 1          |
| <b>Thymus</b>                               |                          |         |           |           |            |
| Haemorrhages, medulla                       |                          | 1       | X         | X         | 0          |
| <b>Lungs</b>                                |                          |         |           |           |            |
| Granuloma, alveolar                         |                          | 0       | X         | X         | 1          |
| Infiltrate, inflammatory cells, alveolar    |                          | 1       | X         | X         | 1          |
| Inflammation, chronic, alveolar             |                          | 0       | X         | X         | 1          |

**Note:** Organs not included in table did not reveal any gross and histopathological findings. X = Organs not examined as per study plan.

Table 2. Pathological examination in female rats.

| Groups                          |                   | 0 mg/kg | 250 mg/kg | 500 mg/kg | 1000 mg/kg |
|---------------------------------|-------------------|---------|-----------|-----------|------------|
| Organs & Lesions                | Number of animals | 10      | 10        | 10        | 10         |
| <b>Gross findings</b>           |                   |         |           |           |            |
| <b>External examination</b>     |                   |         |           |           |            |
| No abnormality detected         |                   | 10      | 10        | 10        | 10         |
| <b>Internal examination</b>     |                   |         |           |           |            |
| No abnormality detected         |                   | 10      | 10        | 10        | 10         |
| <b>Microscopic examination</b>  |                   |         |           |           |            |
| <b>Adrenals</b>                 |                   |         |           |           |            |
| Accessory adrenocortical tissue |                   | 1       | X         | X         | 2          |
| <b>Kidneys</b>                  |                   |         |           |           |            |
| Hyperplasia, urothelium         |                   | 0       | X         | X         | 1          |
| Mineralisation, tubular         |                   | 6       | X         | X         | 1          |
| Dilation, pelvis                |                   | 0       | X         | X         | 1          |
| <b>Liver</b>                    |                   |         |           |           |            |
| Infiltrate, inflammatory cells  |                   | 1       | X         | X         | 0          |
| <b>Pituitary</b>                |                   |         |           |           |            |
| Cyst, pars distalis             |                   | 0       | X         | X         | 1          |
| <b>Spleen</b>                   |                   |         |           |           |            |
| EMH, increased, red pulp        |                   | 1       | X         | X         | 0          |
| <b>Pancreas</b>                 |                   |         |           |           |            |
| Atrophy, acinar                 |                   | 0       | X         | X         | 1          |

**Note:** Organs not included in table did not reveal any gross and histopathological findings. X = Organs not examined as per study plan.
